# Supplementary material
Source: HighWire-hosted journal article supplement (https://www.genetics.org/content/suppl/2014/11/17/genetics.114.168039)
Supplement: genetics.114.168039-3.pdf [file genetics.114.168039-3.pdf]

**Table S1** Called nucleosome counts for Fig. 1B

| <b>Nucleosome</b> | <b>GAL_WT</b> | <b>GLU_<i>yta7</i></b> | <b>GAL_<i>Yta7oe</i></b> |
|-------------------|---------------|------------------------|--------------------------|
| -1                | 6016          | 6036                   | 5926                     |
| +1                | 6159          | 6238                   | 6122                     |
| +2                | 5681          | 5742                   | 5623                     |
| +3                | 5160          | 5235                   | 5083                     |
| +4                | 4630          | 4711                   | 4547                     |
| +5                | 4140          | 4240                   | 4061                     |
| +6                | 3716          | 3823                   | 3616                     |
